# Supplementary material for: Best Practices: Long-Term Impact of Web-Based Tools, Leadership Feedback, and Policies on Inpatient Antipsychotic Polypharmacy
Source: Atypon-hosted journal article supplement (doi:10.1176/ps.62.10.pss6210_1124), 2011-10-01
Supplement: Finnerty_ds_fig.pdf [file Finnerty_ds_fig.pdf]

**Figure 1**

Prevalence of antipsychotic polypharmacy among inpatients, April 2004 to January 2008<sup>a</sup>

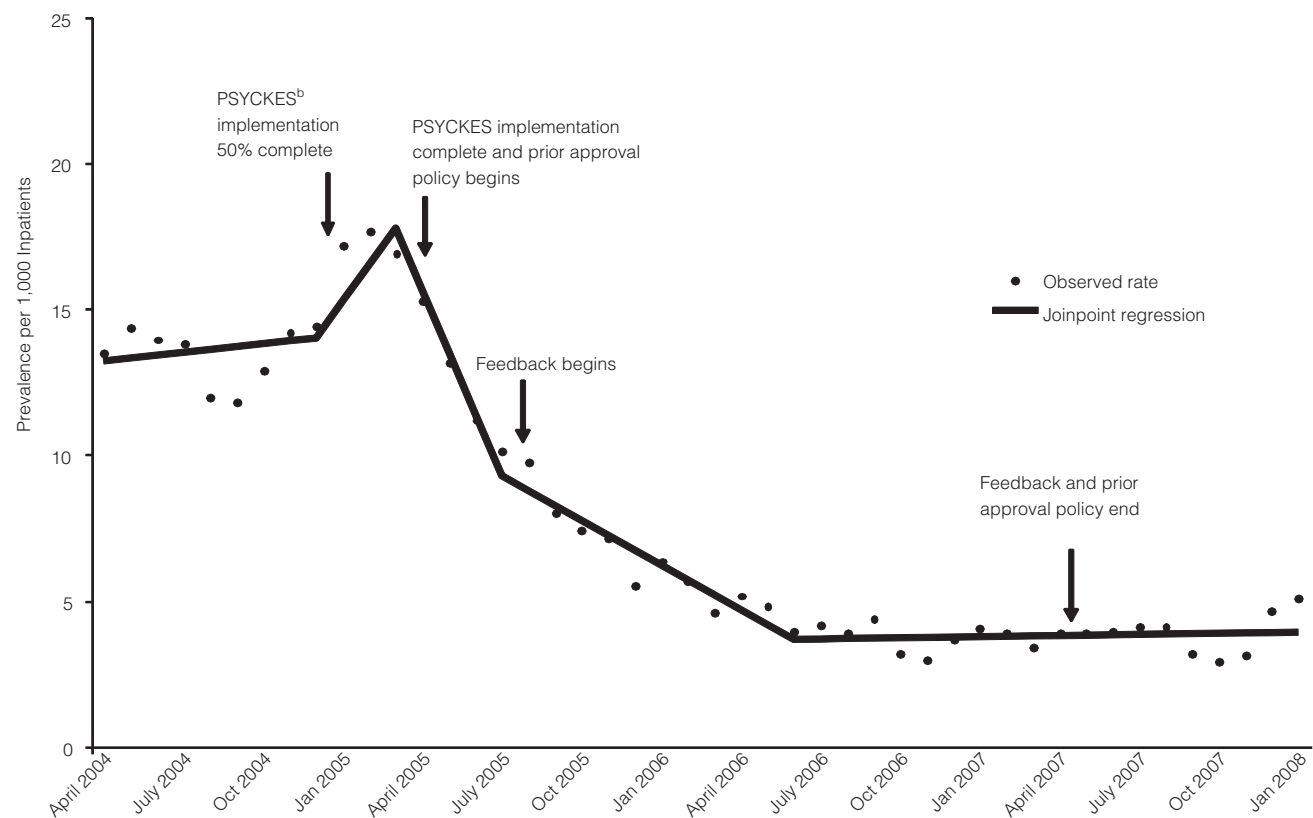

<sup>a</sup> Polypharmacy was defined as prescription of three or more antipsychotics to the same patient for longer than 60 days.

<sup>b</sup> Psychiatric Services and Clinical Knowledge Enhancement System
